# Supplementary material for: Qindan Capsule Attenuates Myocardial Hypertrophy and Fibrosis in Pressure Overload-Induced Mice Involving mTOR and TGF-β1/Smad Signaling Pathway Inhibition
Source: Hindawi journal article supplement (doi:10.1155/2021/5577875), 2021-04-28
Supplement: f1 [file 5577875.f1.zip]

Table S2. Mouse primers used for real-time RT-PCR.

| Gene         |         | Primer Sequence               |
|--------------|---------|-------------------------------|
| BNP          | Forward | 5'- CGTCAGTCGTTTGGGCTGTAA-3'  |
|              | Reverse | 5'- CACTTCAAAGGTGGTCCCAGAG-3' |
| ANP          | Forward | 5'- GGACTAGGCTGCAACAGCTTC-3'  |
|              | Reverse | 5'- GTGACACACCACAAGGGCTTA-3'  |
| $\beta$ -MHC | Forward | 5'-ATGTGCCGGACCTTGGAA-3'      |
|              | Reverse | 5'-CCTCGGGTTAGCTGAGAGATCA-3'  |
| GAPDH        | Forward | 5'- TGTGTCCGTCGTGGATCTGA-3'   |
|              | Reverse | 5'- TTGCTGTTGAAGTCGCAGGAG-3'  |
