# Supplementary material for: Qindan Capsule Attenuates Myocardial Hypertrophy and Fibrosis in Pressure Overload-Induced Mice Involving mTOR and TGF-β1/Smad Signaling Pathway Inhibition
Source: Hindawi journal article supplement (doi:10.1155/2021/5577875), 2021-04-28
Supplement: f1 [file 5577875.f1.zip]

Baicalin-standard

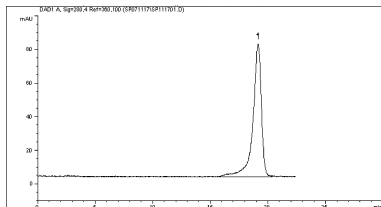

Baicalin-QC sample

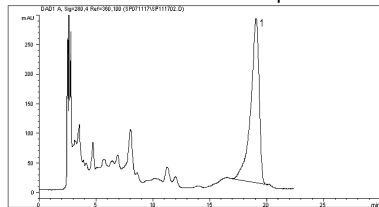

(a)

3,4-dihydroxyphenyllactic acid-standard

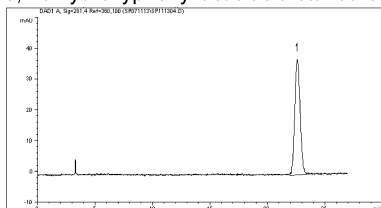

3,4-dihydroxyphenyllactic acid-QC sample

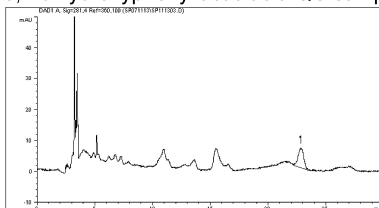

(b)

Berberine-standard

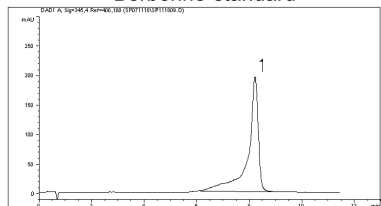

Berberine-QC sample

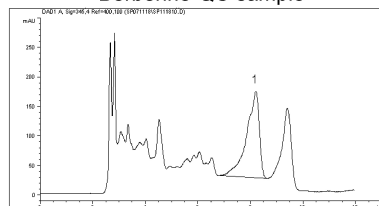

(c)

Rhynchophylline-standard

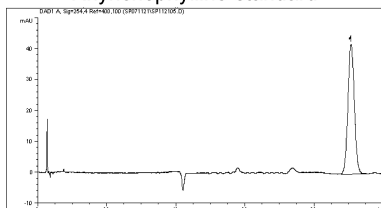

Rhynchophylline-QC sample

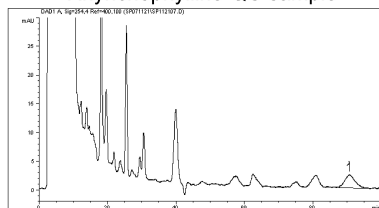

(d)

Stachydrine-standard

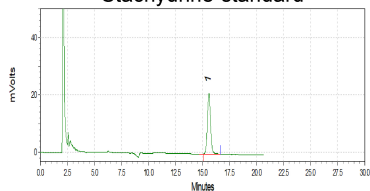

Stachydrine-QC sample

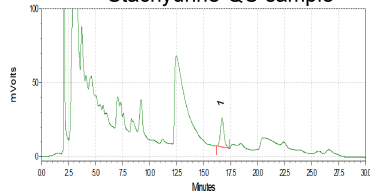

(e)
