# Supplementary material for: Qindan Capsule Attenuates Myocardial Hypertrophy and Fibrosis in Pressure Overload-Induced Mice Involving mTOR and TGF-β1/Smad Signaling Pathway Inhibition
Source: Hindawi journal article supplement (doi:10.1155/2021/5577875), 2021-04-28
Supplement: f1 [file 5577875.f1.zip]

Table S1 Recipe of Qindan-capsule (QC) formulation

| Components                                           | Voucher specimens' number | Part            | Weight (g) |
|------------------------------------------------------|---------------------------|-----------------|------------|
| <i>Scutellaria baicalensis</i> Georgi                | SDU0174                   | Root            | 12         |
| <i>Salvia miltiorrhiza</i> Bge                       | SDU0159                   | Root            | 30         |
| <i>Coptis chinensis</i> Franch                       | SDU0186                   | Rhizome         | 9          |
| <i>Uncaria rhynchophylla</i> (Miq.) Miq. ex<br>Havil | SDU0177                   | Ramulus         | 30         |
| <i>Ligusticum striatum</i> DC                        | SDU0132                   | Rhizome         | 9          |
| <i>Pheretima aspergillum</i> (E. Perrier)            | SDU0213                   | Dried body      | 12         |
| <i>Leonurus japonicus</i> Houtt                      | SDU0187                   | Aerial part     | 15         |
| <i>Scurrula parasitica</i> L                         | SDU0166                   | Stem and branch | 20         |
