# Supplementary material for: Qindan Capsule Attenuates Myocardial Hypertrophy and Fibrosis in Pressure Overload-Induced Mice Involving mTOR and TGF-β1/Smad Signaling Pathway Inhibition
Source: Hindawi journal article supplement (doi:10.1155/2021/5577875), 2021-04-28
Supplement: f1 [file 5577875.f1.zip]

Table S3. Echocardiographic parameters in different time point

|                       | Sham      | TAC          | TAC+QCL    | TAC+QCH    | TAC+LST    |
|-----------------------|-----------|--------------|------------|------------|------------|
| 0 week                |           |              |            |            |            |
| Heart rate (beat/min) | 496±13    | 482±19       | 513±21     | 492±14     | 521±25     |
| LVIDd (mm)            | 3.11±0.12 | 3.19±0.13    | 3.26±0.12  | 3.24±0.14  | 3.22±0.13  |
| LVIDs (mm)            | 1.62±0.12 | 1.61±0.11    | 1.61±0.13  | 1.63±0.13  | 1.68±0.12  |
| LVPWd (mm)            | 0.75±0.06 | 0.78±0.08    | 0.74±0.08  | 0.76±0.07  | 0.77±0.07  |
| FS (%)                | 48.3±2.2  | 47.8±2.4     | 50.9±2.4   | 49.8±2.5   | 48.5±2.3   |
| EF (%)                | 81.3±3.5  | 83.2±3.9     | 85.7±4.3   | 83.6±3.8   | 80.6±3.5   |
| 4 weeks               |           |              |            |            |            |
| Heart rate (beat/min) | 517±21    | 524±24       | 508±26     | 499±25     | 512±21     |
| LVIDd (mm)            | 3.14±0.13 | 3.46±0.19    | 3.37±0.21  | 3.24±0.16  | 3.39±0.18  |
| LVIDs (mm)            | 1.68±0.13 | 2.12±0.16    | 1.89±0.17  | 1.86±0.18  | 1.92±0.19  |
| LVPWd (mm)            | 0.78±0.07 | 1.16±0.12**  | 0.98±0.09  | 0.86±0.08# | 0.92±0.11  |
| FS (%)                | 48.3±2.1  | 38.1±2.3     | 43.9±2.4   | 44.3±2.3   | 43.4±2.5   |
| EF (%)                | 80.6±3.5  | 67.7±4.9     | 71.8±5.6   | 72.8±5.1   | 70.3±4.9   |
| 8 weeks               |           |              |            |            |            |
| Heart rate (beat/min) | 503±27    | 518±26       | 531±29     | 523±27     | 527±24     |
| LVIDd (mm)            | 3.21±0.14 | 3.89±0.16*   | 3.63±0.15  | 3.42±0.18  | 3.74±0.19  |
| LVIDs (mm)            | 1.69±0.11 | 2.93±0.17*** | 2.37±0.18  | 2.08±0.17# | 2.41±0.19  |
| LVPWd (mm)            | 0.77±0.06 | 1.29±0.11*** | 0.93±0.07# | 0.85±0.06# | 0.91±0.09# |
| FS (%)                | 47.3±2.3  | 24.2±2.6***  | 34.7±2.5#  | 38.6±2.8## | 35.6±2.9#  |
| EF (%)                | 80.6±3.9  | 45.8±4.6***  | 66.9±4.9#  | 69.2±5.6#  | 67.3±5.4#  |

Cardiac functional parameters measured by transthoracic echocardiography at week 0 (baseline), week 4, and week 8 post-surgery. LVIDd, left ventricular internal dimension at diastole; LVIDs, left ventricular internal dimension at systole; LVPWd, left ventricular posterior wall at diastole; FS,

fractional shortening; EF, ejection fraction. \* $P < 0.05$ , \*\* $P < 0.01$ , \*\*\* $P < 0.001$  vs. Sham group; # $P < 0.05$ , ## $P < 0.01$  vs. TAC group. Data are mean  $\pm$  SEM. n = 12 in each group.
